# Supplementary material for: Manipulation of components of the renin angiotensin system in renal proximal tubules fails to alter atherosclerosis in hypercholesterolemic mice
Source: Frontiers journal article supplement (doi:10.3389/fcvm.2023.1250234), 2023-08-16
Supplement: Data_Sheet_1.PDF [file Data_Sheet_1.PDF]

## SUPPLEMENTAL MATERIALS

### Manipulation of Components of the Renin Angiotensin System in Renal Proximal

### Tubules Fails to Alter Atherosclerosis in Hypercholesterolemic Mice

Masayoshi Kukida,<sup>1\*</sup> Naofumi Amioka,<sup>1\*</sup> Dien Ye,<sup>1</sup> Hui Chen,<sup>1</sup> Jessica J. Moorlegghen,<sup>1</sup>  
Ching-Ling Liang,<sup>1</sup> Deborah A. Howatt,<sup>1</sup> Yuriko Katsumata,<sup>2,3</sup> Motoko Yanagita,<sup>4,5</sup>  
Hisashi Sawada,<sup>1,6,7</sup> Alan Daugherty,<sup>1,6,7</sup> Hong S. Lu<sup>1,6,7</sup>

<sup>1</sup> Saha Cardiovascular Research Center,

<sup>2</sup> Sanders-Brown Center on Aging,

<sup>3</sup> Department of Biostatistics,

<sup>6</sup> Saha Aortic Center,

<sup>7</sup> Department of Physiology, University of Kentucky, KY, USA

<sup>4</sup> Department of Nephrology, Kyoto University Graduate School of Medicine, Kyoto,  
Japan

<sup>5</sup> Institute for the Advanced Study of Human Biology (WPI-ASHBi), Kyoto University,  
Kyoto, Japan

\*These authors are joint first authors

**Short title:** PTC-specific RAS in Atherosclerosis

**Corresponding Authors:**

Alan Daugherty: [Alan.Daugherty@uky.edu](mailto:Alan.Daugherty@uky.edu)

Hong S. Lu: [Hong.Lu@uky.edu](mailto:Hong.Lu@uky.edu)

## MAJOR RESOURCES TABLES

### Animals (in vivo studies) – Mice

**Figure 1**

| Genotypes        | Sex    | Vendor or Source       | Strain # | Persistent ID/URL                                                                 |
|------------------|--------|------------------------|----------|-----------------------------------------------------------------------------------|
| LDL receptor -/- | Male   | The Jackson Laboratory | 002207   | <a href="https://www.jax.org/strain/002207">https://www.jax.org/strain/002207</a> |
| LDL receptor -/- | Female | The Jackson Laboratory | 002207   |                                                                                   |

**Figure 2B**

| Genotypes                                                   | Sex  | Vendor or Source  |
|-------------------------------------------------------------|------|-------------------|
| ROSA26R <sup>LacZ</sup> <i>Ndr1</i> -CreERT2 <sup>0/0</sup> | Male | In house breeding |
| ROSA26R <sup>LacZ</sup> <i>Ndr1</i> -CreERT2 <sup>+/-</sup> | Male | In house breeding |

**Figure 2C**

| Genotypes                                                    | Sex  | Vendor or Source  |
|--------------------------------------------------------------|------|-------------------|
| ROSA26R <sup>mT/mG</sup> <i>Ndr1</i> -CreERT2 <sup>0/0</sup> | Male | In house breeding |
| ROSA26R <sup>mT/mG</sup> <i>Ndr1</i> -CreERT2 <sup>+/-</sup> | Male | In house breeding |

**Figure 3**

| Genotypes                                                              | Sex             | Vendor or Source  |
|------------------------------------------------------------------------|-----------------|-------------------|
| <i>Agtr1a</i> f/f <i>Ndr1</i> -CreERT2 <sup>0/0</sup> LDL receptor -/- | Male and Female | In house breeding |
| <i>Agtr1a</i> f/f <i>Ndr1</i> -CreERT2 <sup>+/-</sup> LDL receptor -/- | Male and Female | In house breeding |

**Figure 4**

| Genotypes                                                           | Sex             | Vendor or Source  |
|---------------------------------------------------------------------|-----------------|-------------------|
| <i>Ace</i> f/f <i>Ndr1</i> -CreERT2 <sup>0/0</sup> LDL receptor -/- | Male and Female | In house breeding |
| <i>Ace</i> f/f <i>Ndr1</i> -CreERT2 <sup>+/-</sup> LDL receptor -/- | Male and Female | In house breeding |

**Figure 5**

| Genotypes                                              | Sex  | Vendor or Source  |
|--------------------------------------------------------|------|-------------------|
| LDL receptor -/- (wild-type control)                   | Male | In house breeding |
| <i>Kap</i> -hAGT x LDL receptor -/-                    | Male | In house breeding |
| <i>Kap</i> -hREN x LDL receptor -/-                    | Male | In house breeding |
| <i>Kap</i> -hAGT x <i>Kap</i> -hREN x LDL receptor -/- | Male | In house breeding |

**Figure 6**

| Genotypes                            | Sex  | Vendor or Source  |
|--------------------------------------|------|-------------------|
| LDL receptor -/- (wild-type control) | Male | In house breeding |
| <i>Kap</i> -hREN x LDL receptor -/-  | Male | In house breeding |

## Mouse Breeding Pairs

**Figure 2B**

| Genotypes                            | Sex    | Vendor or Source                         |
|--------------------------------------|--------|------------------------------------------|
| <i>Ndr</i> g1-CreERT2 <sup>+/0</sup> | Male   | In house breeding                        |
| ROSA26R <sup>LacZ</sup>              | Female | The Jackson Laboratory (Strain # 003474) |

**Figure 2C**

| Genotypes                            | Sex    | Vendor or Source                         |
|--------------------------------------|--------|------------------------------------------|
| <i>Ndr</i> g1-CreERT2 <sup>+/0</sup> | Male   | In house breeding                        |
| ROSA26R <sup>mT/mG</sup>             | Female | The Jackson Laboratory (Strain # 007676) |

**Figure 3**

| Genotypes                                                               | Sex    | Vendor or Source  |
|-------------------------------------------------------------------------|--------|-------------------|
| <i>Agtr1a</i> f/f <i>Ndr</i> g1-CreERT2 <sup>+/0</sup> LDL receptor -/- | Male   | In house breeding |
| <i>Agtr1a</i> f/f <i>Ndr</i> g1-CreERT2 <sup>0/0</sup> LDL receptor -/- | Female | In house breeding |

**Figure 4**

| Genotypes                                                            | Sex    | Vendor or Source  |
|----------------------------------------------------------------------|--------|-------------------|
| <i>Ace</i> f/f <i>Ndr</i> g1-CreERT2 <sup>+/0</sup> LDL receptor -/- | Male   | In house breeding |
| <i>Ace</i> f/f <i>Ndr</i> g1-CreERT2 <sup>0/0</sup> LDL receptor -/- | Female | In house breeding |

**Figure 5**

| Genotypes                           | Sex    | Vendor or Source  |
|-------------------------------------|--------|-------------------|
| Breeding Strategy 1                 |        |                   |
| <i>Kap</i> -hAGT x LDL receptor -/- | Male   | In house breeding |
| <i>Kap</i> -hREN x LDL receptor -/- | Female | In house breeding |
| Breeding Strategy 2                 |        |                   |
| <i>Kap</i> -hREN x LDL receptor -/- | Male   | In house breeding |
| <i>Kap</i> -hAGT x LDL receptor -/- | Female | In house breeding |

**Figure 6**

| Genotypes                           | Sex    | Vendor or Source  |
|-------------------------------------|--------|-------------------|
| Breeding Strategy 1                 |        |                   |
| LDL receptor -/-                    | Male   | In house breeding |
| <i>Kap</i> -hREN x LDL receptor -/- | Female | In house breeding |
| Breeding Strategy 2                 |        |                   |
| <i>Kap</i> -hREN x LDL receptor -/- | Male   | In house breeding |
| LDL receptor -/-                    | Female | In house breeding |

## Primer Sequences for Genotyping

| Gene        | Vendor or Source            | Primer Sequence (5'-3')                                                                              |
|-------------|-----------------------------|------------------------------------------------------------------------------------------------------|
| <i>hAGT</i> | Integrated DNA Technologies | Forward: TGG TGC TAG TCG CTG CAA AAC TTG ACA CCG<br>Reverse: CAG GGA GCA GCC AGT CTT CCA TCC TGT CAC |
| <i>hREN</i> | Integrated DNA Technologies | Forward: TGA CAC TGG TTC GTC CAA TG<br>Reverse: ATA GCG GAG GGT GAG TTC TG                           |
| Cre         | Integrated DNA Technologies | Forward: ACC TGA AGA TGT TCG CGA TT<br>Reverse: CGG CAT CAA CGT TTT CTT TT                           |
| <i>IL-2</i> | Integrated DNA Technologies | Forward: CTA GGC CAC AGA ATT GAA AGA TCT<br>Reverse: GTA GGT GGA AAT TCT AGC ATC ATC C               |

## Primer Information (TaqMan Probes) for Quantitative Polymerase Chain Reaction (qPCR)

| Gene         | Vendor or Source         | Catalog #     |
|--------------|--------------------------|---------------|
| <i>Ace</i>   | Thermo Fisher Scientific | Mm00802048_m1 |
| <i>Actb</i>  | Thermo Fisher Scientific | Mm01205647_g1 |
| <i>Gapdh</i> | Thermo Fisher Scientific | Mm99999915_g1 |
| <i>Ppia</i>  | Thermo Fisher Scientific | Mm02342429_g1 |

## Primer Information for qPCR using SYBR Green Method

| Gene          | Vendor or Source            | Primer Sequence (5'-3')                                                       |
|---------------|-----------------------------|-------------------------------------------------------------------------------|
| <i>Agtr1a</i> | Integrated DNA Technologies | Forward: GAC CAA CTC AAC CCA GAA AAG C<br>Reverse: ATC ACC ACC AAG CTG TTT CC |
| <i>hAGT</i>   | Integrated DNA Technologies | Forward: GAA CTG GAT GTT GCT GCT GA<br>Reverse: GGA GAA GCC CTT CAT CTT CC    |
| <i>hREN</i>   | Integrated DNA Technologies | Forward: CAA GGG GTG CTA AAA GAG GA<br>Reverse: CTG CCA GAC ACC AGT CTT GA    |
| <i>Actb</i>   | Integrated DNA Technologies | Forward: GCC TTC CTT CTT GGG TAT GG<br>Reverse: GCA CTG TGT TGG CAT AGA GG    |
| <i>Gapdh</i>  | Integrated DNA Technologies | Forward: CAA CTC CCA CTC TTC CAC CT<br>Reverse: CTT GCT CAG TGT CCT TGC TG    |
| <i>Rplp2</i>  | Integrated DNA Technologies | Forward: ATG TCA TCG CTC AGG GTG TT<br>Reverse: CTC CTC GGA CTC CTC CTT CT    |

## Primary Antibodies for Immunostaining

| Target antigen                      | Vendor | Catalog # | Working concentration |
|-------------------------------------|--------|-----------|-----------------------|
| Mouse angiotensin-converting enzyme | abcam  | ab254222  | 0.1 µg/ml             |
| Human angiotensinogen               | abcam  | ab276132  | 0.1 µg/ml             |

## Probes for RNAscope

| Reagents            | Vendor or Source          | Catalog # |
|---------------------|---------------------------|-----------|
| Mouse <i>Agtr1a</i> | Advanced Cell Diagnostics | 481161    |
| Human <i>REN</i>    | Advanced Cell Diagnostics | 401921    |

## Animal Study Information Following the ARRIVE Essential 10

**Figure 1. All mice were LDL receptor -/-**

| Groups                | Sex | Age (weeks) | Number (prior to experiment) | Number (termination) | Littermates (Yes/No) |
|-----------------------|-----|-------------|------------------------------|----------------------|----------------------|
| Vehicle               | M   | 8-10        | 10                           | 10                   | Yes                  |
| Losartan 12.5 mg/kg/d | M   | 8-10        | 10                           | 10                   |                      |
| Vehicle               | F   | 8-10        | 9                            | 10                   |                      |
| Losartan 12.5 mg/kg/d | F   | 8-10        | 10                           | 10                   |                      |

**Figure 3B. All mice were in an LDL receptor -/- background**

| Groups                                                | Sex | Age for tamoxifen injection (weeks) | Number (prior to experiment) | Number (termination) | Littermates (Yes/No) |
|-------------------------------------------------------|-----|-------------------------------------|------------------------------|----------------------|----------------------|
| <i>Agtr1a</i> f/f <i>Ndr1</i> -CreERT2 <sup>0/0</sup> | M   | 4-6                                 | 7                            | 7                    | Yes                  |
| <i>Agtr1a</i> f/f <i>Ndr1</i> -CreERT2 <sup>+/-</sup> | M   | 4-6                                 | 4                            | 4                    |                      |
| <i>Agtr1a</i> f/f <i>Ndr1</i> -CreERT2 <sup>0/0</sup> | F   | 4-6                                 | 7                            | 7                    |                      |
| <i>Agtr1a</i> f/f <i>Ndr1</i> -CreERT2 <sup>+/-</sup> | F   | 4-6                                 | 4                            | 4                    |                      |

**Figure 3D-G. All mice were in an LDL receptor -/- background**

| Groups                                                | Sex | Age for tamoxifen injection (weeks) | Number (prior to experiment) | Number (termination) | Littermates (Yes/No) |
|-------------------------------------------------------|-----|-------------------------------------|------------------------------|----------------------|----------------------|
| <i>Agtr1a</i> f/f <i>Ndr1</i> -CreERT2 <sup>0/0</sup> | M   | 4-6                                 | 13                           | 13                   | Yes                  |
| <i>Agtr1a</i> f/f <i>Ndr1</i> -CreERT2 <sup>+/-</sup> | M   | 4-6                                 | 11                           | 11                   |                      |
| <i>Agtr1a</i> f/f <i>Ndr1</i> -CreERT2 <sup>0/0</sup> | F   | 4-6                                 | 11                           | 11                   |                      |
| <i>Agtr1a</i> f/f <i>Ndr1</i> -CreERT2 <sup>+/-</sup> | F   | 4-6                                 | 11                           | 11                   |                      |

**Figure 4B, D-F. All mice were in an LDL receptor -/- background**

| Groups                                             | Sex | Age for tamoxifen injection (weeks) | Number (prior to experiment) | Number (termination) | Littermates (Yes/No) |
|----------------------------------------------------|-----|-------------------------------------|------------------------------|----------------------|----------------------|
| <i>Ace</i> f/f <i>Ndr1</i> -CreERT2 <sup>0/0</sup> | M   | 4-6                                 | 10                           | 10                   | Yes                  |
| <i>Ace</i> f/f <i>Ndr1</i> -CreERT2 <sup>+/-</sup> | M   | 4-6                                 | 12                           | 12                   |                      |
| <i>Ace</i> f/f <i>Ndr1</i> -CreERT2 <sup>0/0</sup> | F   | 4-6                                 | 13                           | 13                   |                      |
| <i>Ace</i> f/f <i>Ndr1</i> -CreERT2 <sup>+/-</sup> | F   | 4-6                                 | 7                            | 7                    |                      |

**Figure 5B-C and E-H. All mice were in an LDL receptor -/- background**

| Groups                              | Sex | Age (weeks) | Number (prior to experiment) | Number (termination) | Littermates (Yes/No) |
|-------------------------------------|-----|-------------|------------------------------|----------------------|----------------------|
| Wild-type                           | M   | 7-9         | 6                            | 6                    | Yes                  |
| <i>Kap</i> -hAGT                    | M   | 7-9         | 4                            | 4                    |                      |
| <i>Kap</i> -hREN                    | M   | 7-9         | 3                            | 3                    |                      |
| <i>Kap</i> -hAGT x <i>Kap</i> -hREN | M   | 7-9         | 4                            | 4                    |                      |

**Figure 6B-C, E, G-J. All mice were in an LDL receptor -/- background**

| Groups                                        | Sex | Age (weeks) | Number (prior to experiment) | Number (termination) | Littermates (Yes/No) |
|-----------------------------------------------|-----|-------------|------------------------------|----------------------|----------------------|
| Wild-type injected with null.AAVs             | M   | 6-12        | 9                            | 9                    | Yes                  |
| <i>Kap</i> -hREN injected with null.AAVs      | M   | 6-12        | 8                            | 8                    |                      |
| <i>Kap</i> -hREN mice injected with hAGT.AAVs | M   | 6-12        | 7                            | 7                    |                      |

| Item                    | Application                                                                                                                                                                                                                                                                                                                                                      |
|-------------------------|------------------------------------------------------------------------------------------------------------------------------------------------------------------------------------------------------------------------------------------------------------------------------------------------------------------------------------------------------------------|
| Ethics                  | Approved by the University of Kentucky IACUC (2018-2968).                                                                                                                                                                                                                                                                                                        |
| Sex                     | Most studies included both male and female mice. In the experiments using testosterone pellets (Figures 5 and 6), only male mice were studied due to the frequent occurrence of uterine prolapse in female mice following testosterone pellet implantation, which were required to be euthanatized prior to reaching the endpoint based on the IACUC regulation. |
| Inclusion criteria      | Based on sex, age, body weight, and overt health appearance in each experiment.                                                                                                                                                                                                                                                                                  |
| Exclusion criteria      | Based on sex, age, and body weight, Medical cases reported by a veterinarian                                                                                                                                                                                                                                                                                     |
| Sample size             | Described in each figure legend.                                                                                                                                                                                                                                                                                                                                 |
| Sample size calculation | None                                                                                                                                                                                                                                                                                                                                                             |
| Primary endpoint        | Atherosclerosis in aortas                                                                                                                                                                                                                                                                                                                                        |
| Randomization           | Study mice were numbered and grouped randomly based on their genotypes                                                                                                                                                                                                                                                                                           |
| Blinding                | Quantification of atherosclerosis was verified by an independent investigator blinded to the study group information.                                                                                                                                                                                                                                            |
| Statistical analysis    | SigmaPlot version 14.5 or 15.0 (SYSTAT Software Inc., CA), or R Statistical Software (v4.1.1; R Core Team 2021)                                                                                                                                                                                                                                                  |
| Statistical method      | Described in each figure legend                                                                                                                                                                                                                                                                                                                                  |
| Data availability       | All numerical data used for figures are available in Supplemental Excel File.                                                                                                                                                                                                                                                                                    |
